# Supplementary material for: Evaluation and optimization of biomarkers in a primary dysmenorrhea model using ultra performance liquid chromatography coupled with quadrupole-time-of-flight mass spectrometry combined with a support vector machine
Source: Royal Society of Chemistry journal article supplement (doi:10.1039/c5ra08568c), 2015-01-01
Supplement: c5ra08568c1.pdf [file c5ra08568c1.pdf]

## Supplementary Information

### **Evaluation and optimization of biomarkers in primary dysmenorrhea model using ultra performance liquid chromatography coupled with quadrupole-time-of-flight mass spectrometry combined with support vector machine**

Ling Fang<sup>a</sup>, Xinyu Liu<sup>a</sup>, Zhenzhu Zhang<sup>a</sup>, Aizhu Li<sup>a</sup>, Haoyue Deng<sup>a</sup>, Lei Wang<sup>a</sup>,  
Zhiguo Hou<sup>a</sup>, Caiyun Gu<sup>a</sup>, YanYan Xu<sup>\*a</sup>, Yubo Li<sup>\*a</sup>

*<sup>a</sup>Tianjin State Key Laboratory of Modern Chinese Medicine, School of Traditional Chinese Materia Medica, Tianjin University of Traditional Chinese Medicine, 312 Anshan west Road, Tianjin 300193, China.*

**\*Author for correspondence:**

e-mail: yaowufenxi001@sina.com.

Tel and Fax number: 022-59596261.

## 2. Materials and methods

### 2.1 Animal experiment

On the last day, the blood was drawn from abdominal aorta after anesthetization. Then the blood was separated to make serum and plasma. The newly obtained plasma specimen was immediately centrifuged at 3000 g in 4 °C for 15 min. Then stored at -80 °C for the subsequent analysis. And the serum specimen was performed for biochemical assay.

## 3. Results

### 3.1 Biochemical analysis

Figure S1. The standard curve of PGF2 $\alpha$

Independent sample student's *t*-test is used to calculate the difference between the control group and the PD model group according to SPSS software.

Table S1. The level of PGF2 $\alpha$  in PD model group and control group.

|                       | PGF2 $\alpha$ ( pg/mL) |       |       |       |       |       |
|-----------------------|------------------------|-------|-------|-------|-------|-------|
| <b>PD model group</b> | 29.23                  | 30.20 | 24.11 | 29.14 | 29.50 | 30.56 |
| <b>Control group</b>  | 32.61                  | 36.50 | 29.77 | 31.30 | 31.04 | 35.60 |

### 3.2 Metabolic profiling and data processing

Typical base peak intensity (BPI) chromatograms of specimen in positive model

obtained from the control group and the PD model group are displayed in Fig.S2,3

Figure S2. Typical BPI chromatogram of plasma PD model group induced by oestrogen coupled with oxytocin at positive electrospray ionization (ESI) mode.

Figure S3. Typical BPI chromatogram of plasma control group at positive electrospray ionization (ESI) mode.

The relative standard deviations(RSD) of the peak areas and retention times of 20 randomly selected chromatographic peaks were less than 15%, which ensure the method confirm to metabolomics requirements.

Table S2 The results of experimental methodology.

| <b>Experiment name</b> | <b>RSD (Peak area)</b> |
|------------------------|------------------------|
| Precision instrument   | <14.89%                |
| Method repeatability   | <14.31%                |
| Sample stability       | <14.90%                |

TableS3.The value of peak area of biomarkers in PD model group.

|           | <b>Mode11</b> | <b>Mode12</b> | <b>Mode13</b> | <b>Mode14</b> | <b>Mode15</b> | <b>Mode16</b> |
|-----------|---------------|---------------|---------------|---------------|---------------|---------------|
| LPC(18:0) | 93911.75      | 217904.26     | 190875.36     | 201741.07     | 161614.2      | 164922.51     |

|              |         |         |         |         |         |         |
|--------------|---------|---------|---------|---------|---------|---------|
| LPC(17:0)    | 904.39  | 1019.31 | 1897.3  | 1854.18 | 1450.49 | 1180.68 |
| sphingosine  | 41.85   | 56.12   | 55.95   | 27.39   | 37.45   | 49.19   |
| LPC(15:0)    | 1523.23 | 1877.37 | 3476.6  | 2398.99 | 2370.18 | 1362.75 |
| progesterone | 172.37  | 189.66  | 262.32  | 201.63  | 76.54   | 75.21   |
| D-Arginine   | 288.15  | 493.18  | 260.32  | 225.86  | 232.87  | 283.41  |
| L-Tyrosine   | 194.22  | 372.98  | 335.86  | 261.2   | 449.89  | 290.9   |
| LPC(18:2)    | 5373.29 | 3239.29 | 2936.91 | 2894.31 | 3343    | 6349.47 |

TableS4. The value of peak area of biomarkers in control group.

|              | Control1  | Control2  | Control3  | Control4  | Control5  | Control6  |
|--------------|-----------|-----------|-----------|-----------|-----------|-----------|
| LPC(18:0)    | 231121.75 | 218338.03 | 187978.71 | 362404.59 | 224935.76 | 238936.35 |
| LPC(17:0)    | 2385.79   | 2309.78   | 4315.89   | 2592.29   | 3245.23   | 3198.94   |
| sphingosine  | 96.38     | 110.52    | 134.79    | 189.41    | 151.1     | 99.14     |
| LPC(15:0)    | 4793.18   | 3159.7    | 3259.82   | 5301.01   | 5153.26   | 2186.89   |
| progesterone | 336.63    | 397.18    | 326.19    | 258.78    | 462.7     | 366.46    |
| D-Arginine   | 1051.92   | 532.69    | 741.09    | 1669.99   | 407.13    | 1250.33   |
| L-Tyrosine   | 554.26    | 369.62    | 525.22    | 651.67    | 578.08    | 636.53    |
| LPC(18:2)    | 1618.92   | 1308.42   | 1428.92   | 1386.54   | 1766.85   | 1457.62   |

### 3.4 Optimization of the biomarkers

Figure S4. 3D view of SVM model of the total eight identified biomarkers (The parameters are described below: Bestc=12.1257, g=0.82469, CV accuracy =100%).
